# Supplementary material for: Cu(dppf) complexes can be synthesized from Cu-exchanged solids and enable a quantification of the Cu-accessibility by 31P MAS NMR spectroscopy
Source: Royal Society of Chemistry journal article supplement (doi:10.1039/d4dt00147h), 2024-01-01
Supplement: d4dt00147h1.pdf [file d4dt00147h1.pdf]

## Electronic Supplementary Information (SI)

# **Cu(dppf) complexes can be synthesized from Cu-exchanged solids and enable a quantification of the Cu-accessibility by $^{31}\text{P}$ MAS NMR spectroscopy**

Elif Kaya,<sup>[a]</sup> Daniel Dittmann,<sup>[a]</sup> Maximilian Schmidt,<sup>[a]</sup> and Michael Dyballa<sup>[a]\*</sup>

[a] Institute of Technical Chemistry, University of Stuttgart, Pfaffenwaldring 55, 70569 Stuttgart, Germany

\*Corresponding author, E-mail: michael.dyballa@itc.uni-stuttgart.de

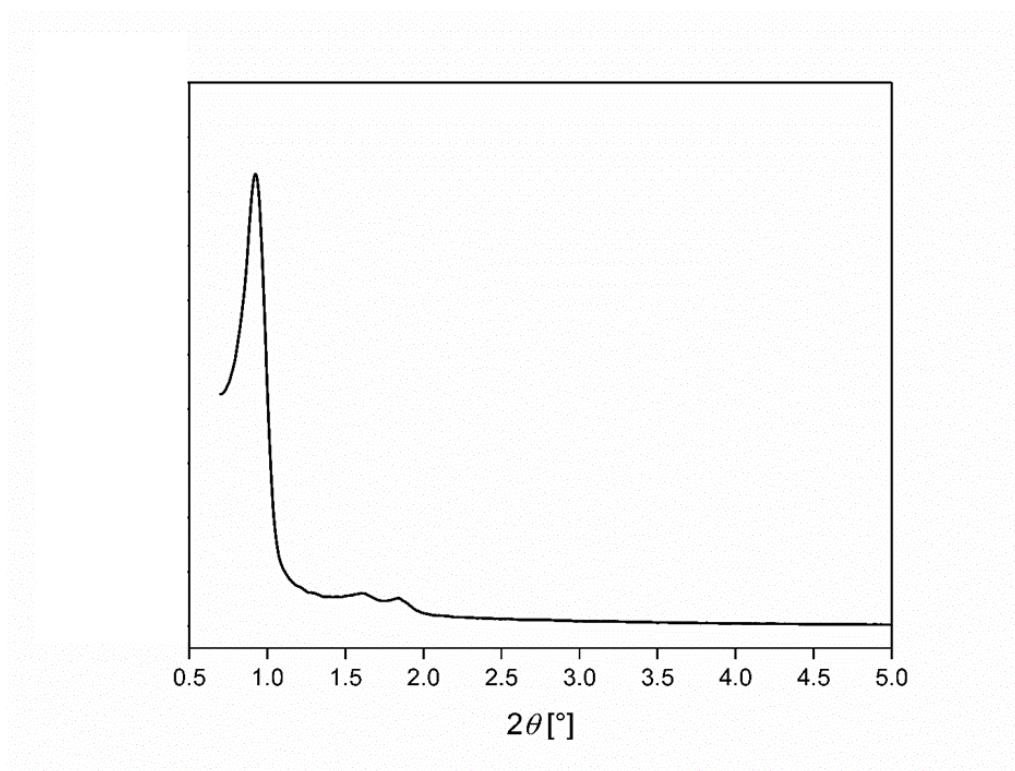

**Figure S1:** Small angle X-ray powder diffraction patterns of the mesoporous SBA-15.

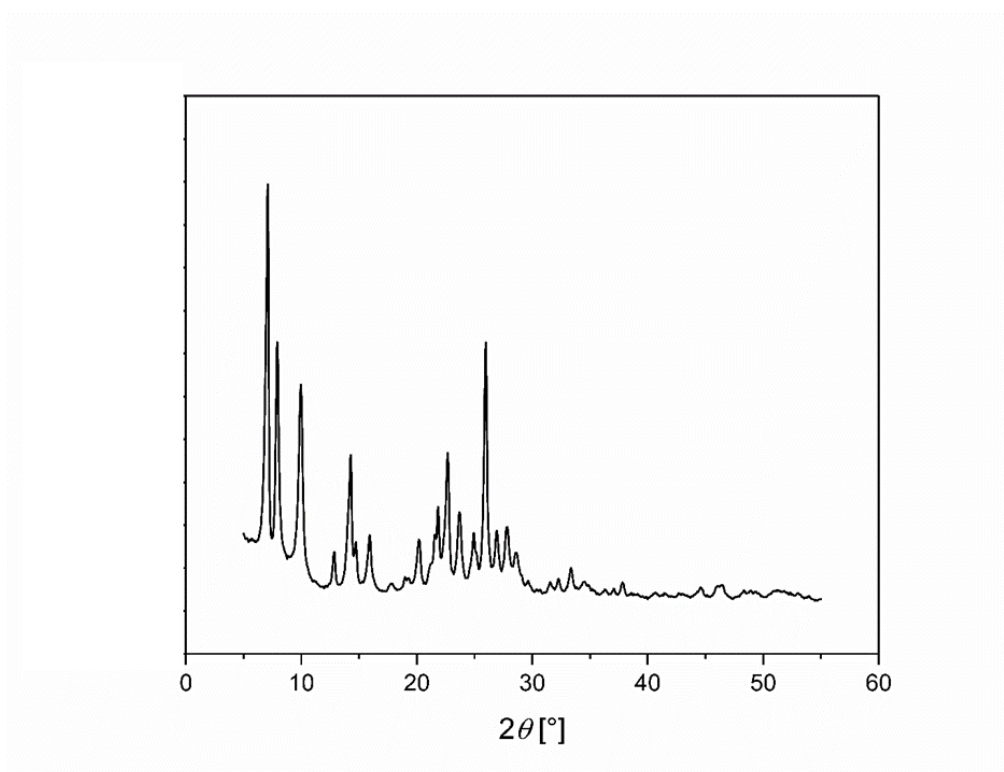

**Figure S2:** X-ray powder diffraction patterns of the microporous H-MCM-22 zeolite.

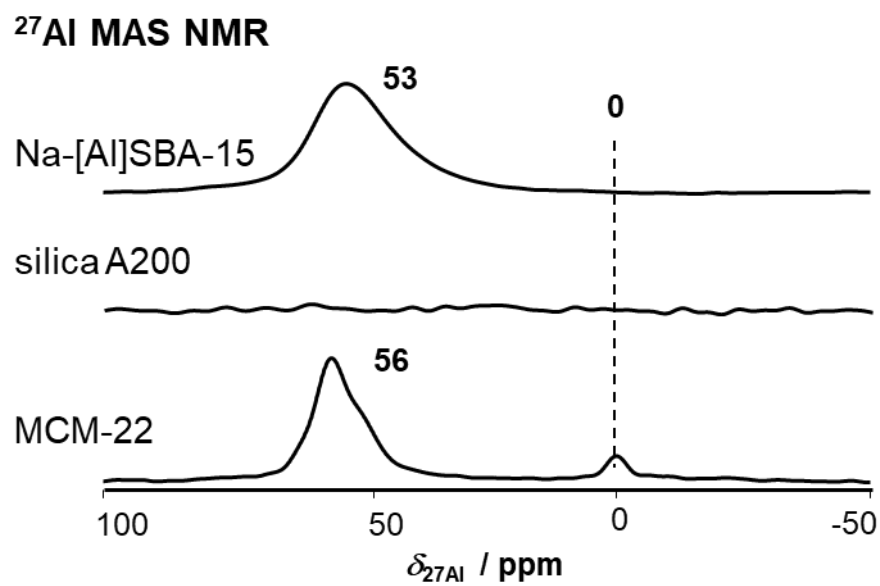

**Figure S3:**  $^{27}\text{Al}$  MAS NMR spectra of Na-[Al]SBA-15, silica A200, and MCM-22.

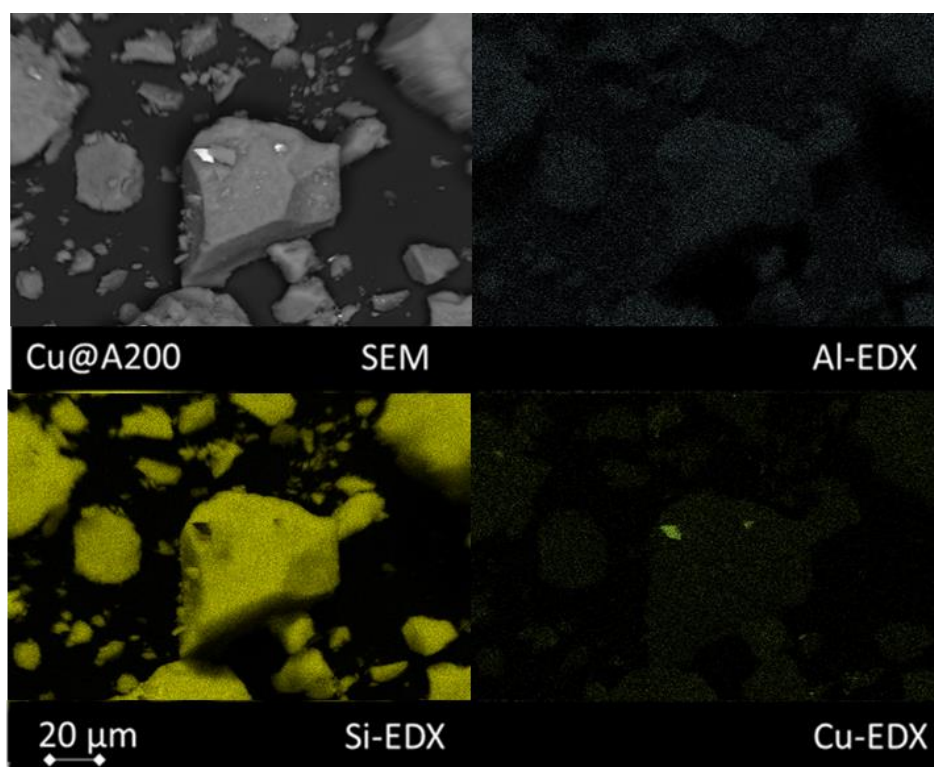

**Figure S4:** SEM (BSE-detector) and EDX screenings on Cu@ A200.

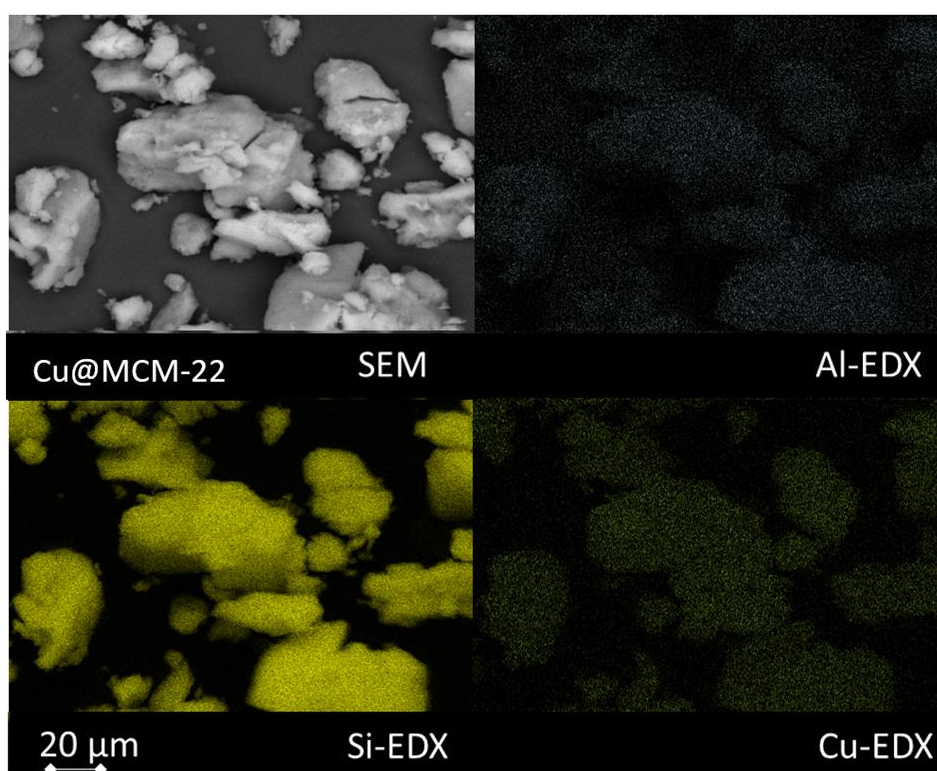

**Figure S5:** SEM and EDX on Cu-MCM-22.

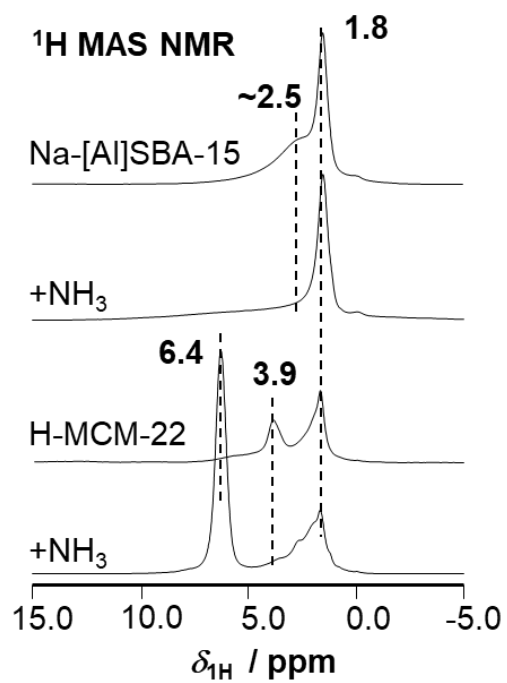

**Figure S6:**  $^1\text{H}$  MAS NMR spectra of Na-[Al]SBA-15 and H-MCM-22 before and after loading  $\text{NH}_3$ .

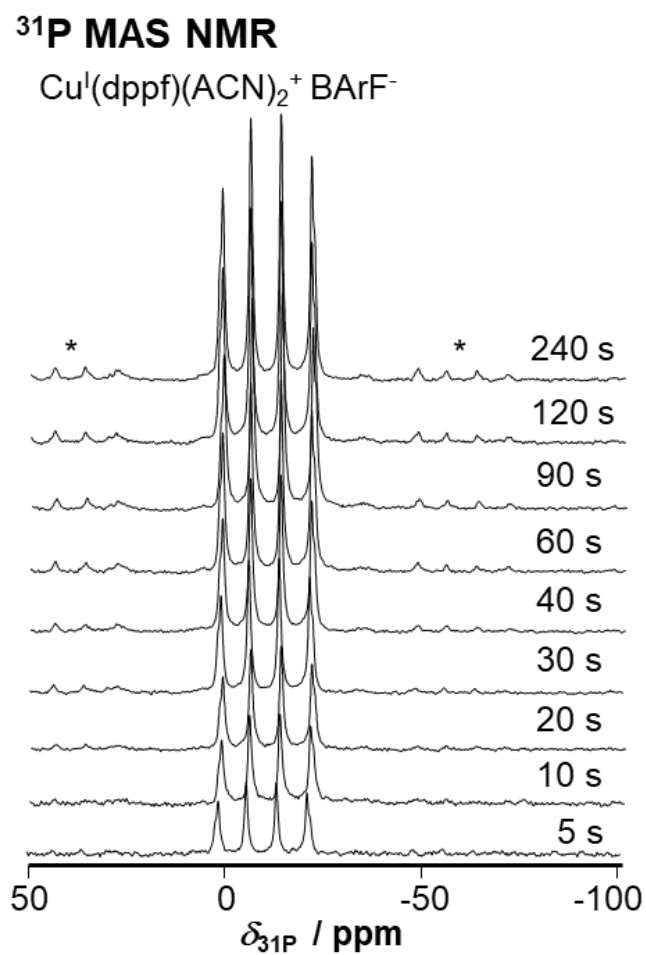

**Figure S7:**  $^{31}\text{P}$  MAS NMR spectra recorded using high-power decoupling (hpdec) by varying the delay time between scans for pure  $\text{Cu}^{\text{I}}(\text{dppf})$  complex shows constantly increasing intensity due to long  $T_1$  relaxation times.

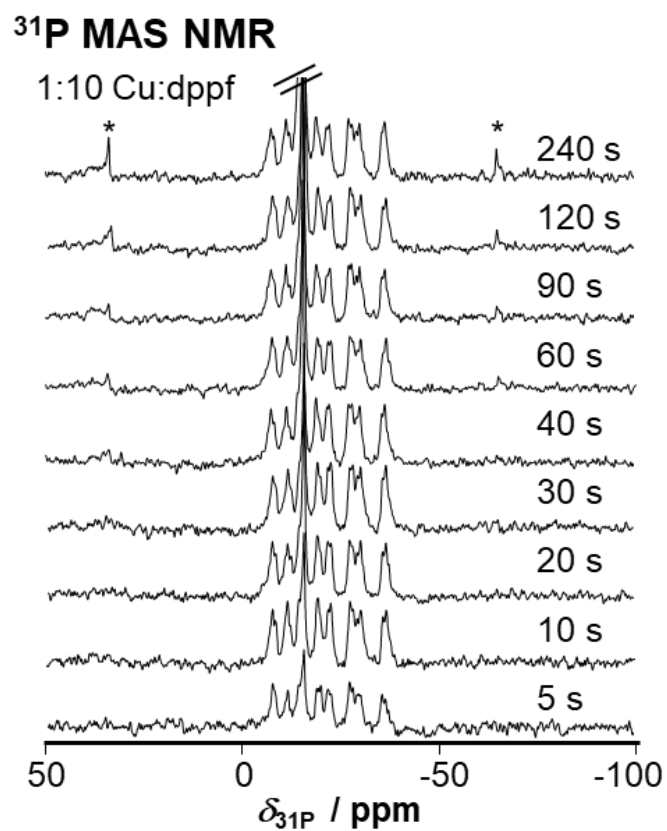

**Figure S8:**  $^{31}\text{P}$  MAS NMR spectra recorded using high-power decoupling (hpdec) by varying the delay time between scans for  $\text{Cu}^{\text{I}}(\text{dppf})$  complex in ion exchange position shows constant intensity after 10 s delay time.

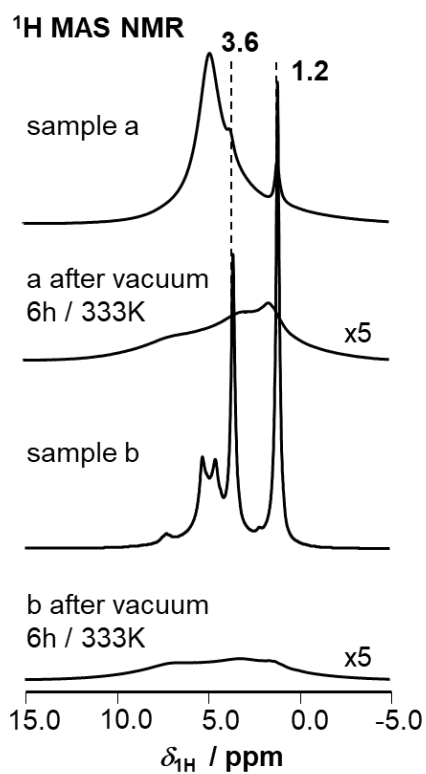

**Figure S9:** <sup>1</sup>H MAS NMR spectra of two samples (a and b) before (top) and after (bottom) removing adsorbed ethanol (peaks at chemical shifts  $\delta_{1H} = 3.6$  and  $1.2$  ppm). Removal of the solvent in vacuum is immanent to measure the correct solid mass.
